# Supplementary material for: Effects of Cooling Rate and Emulsifier Combination on the Colloidal Stability of Crystalline Dispersions Stabilized by Phospholipids and β-Lactoglobulin
Source: MDPI journal article supplement (doi:10.3390/colloids7020045), 2023-06-05
Supplement: s1 [file s1]

**Supplementary Materials:**

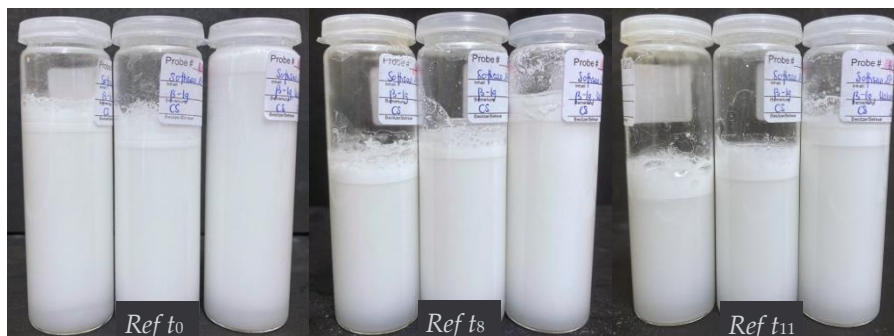

Figure S1: Images of the *Ref* samples cooled at a slow (0.01–0.1 K/min, left flask), moderate (0.5 K/min, middle flask) or fast (10 K/min, right flask) rate, taken at  $t_0$ ,  $t_8$  and  $t_{11}$ .

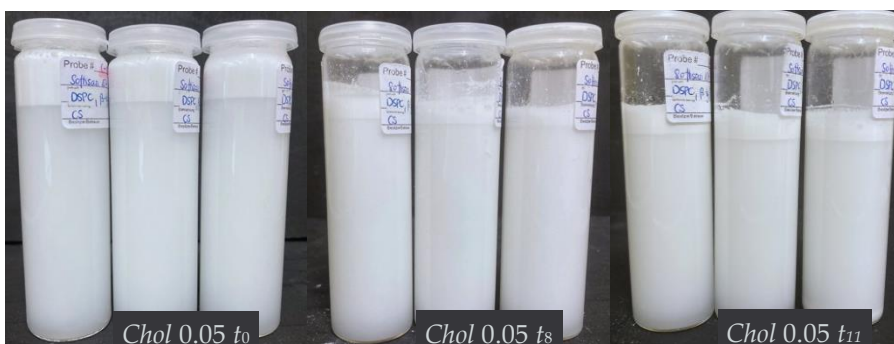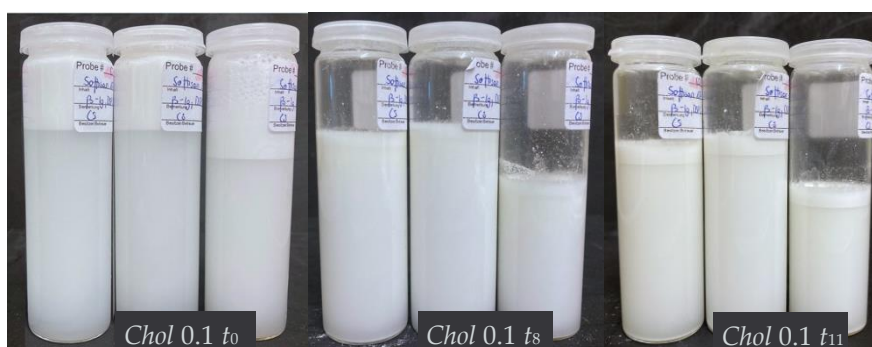

Figure S2: Images of the *Chol 0.05* (upper row) and *Chol 0.1* (lower row) samples cooled at a slow (0.01–0.1 K/min, left flask), moderate (0.5 K/min, middle flask) or fast (10 K/min, right flask) rate, taken at  $t_0$ ,  $t_8$  and  $t_{11}$ .

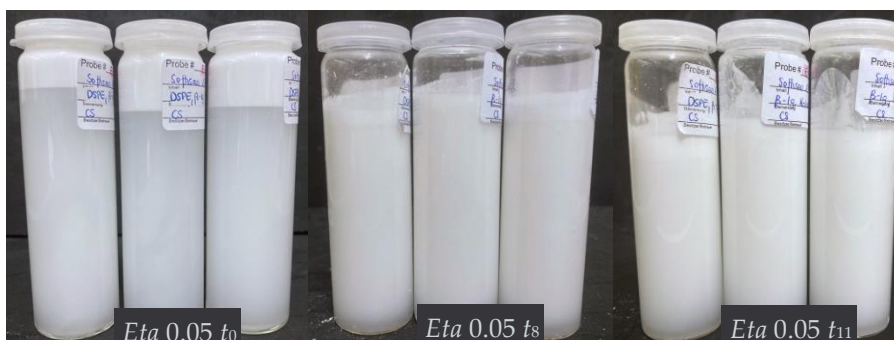

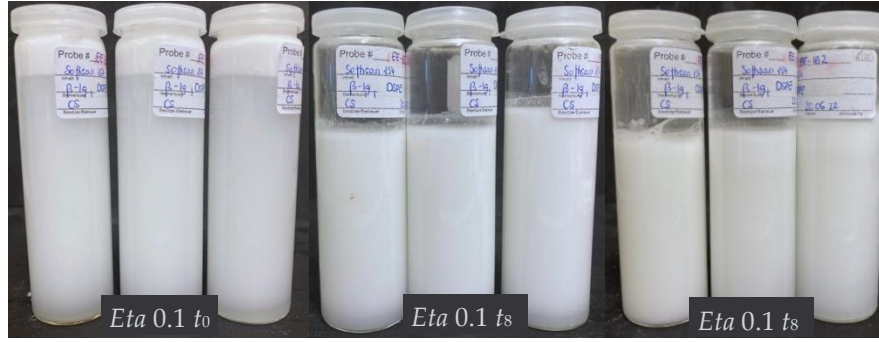

Figure S3: Images of the *Eta* 0.05 (upper row) and *Eta* 0.1 (lower row) samples cooled at a slow (0.01–0.1 K/min, left flask), moderate (0.5 K/min, middle flask) or fast (10 K/min, right flask) rate, taken at  $t_0$ ,  $t_8$  and  $t_{11}$ .

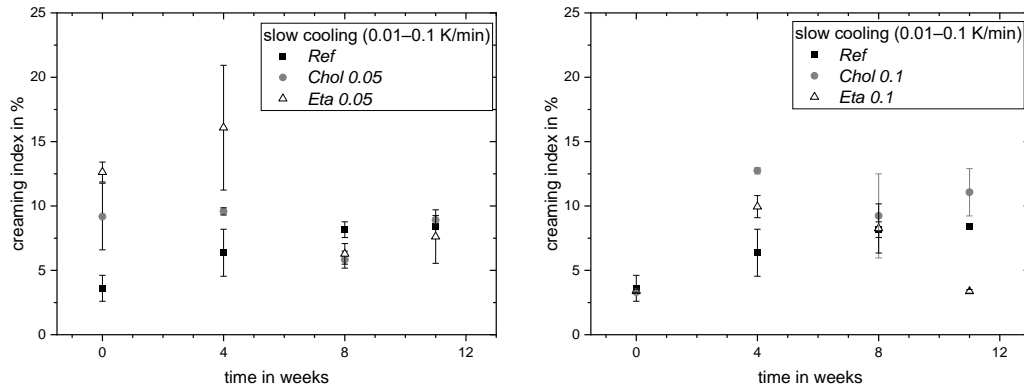

Figure S4: Creaming index (CI) of dispersions stabilized with  $\beta$ -lg (*Ref*),  $\beta$ -lg + PC (*Chol*) and  $\beta$ -lg + PE (*Eta*) as a function of storage time: directly after preparation ( $t_0$ ), after four weeks ( $t_4$ ), after eight weeks ( $t_8$ ) and after eleven weeks ( $t_{11}$ ) of storage. PLs were used in concentrations of 0.05 wt% (*Chol* 0.05 and *Eta* 0.05 (a)) and 0.1 wt% (*Chol* 0.1 and *Eta* 0.1 (b)). Data of the samples cooled at a slow cooling rate are shown.

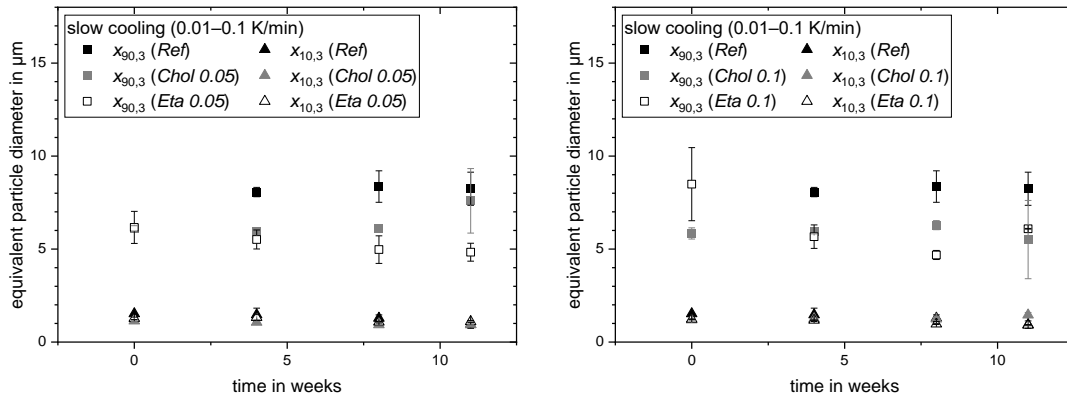

Figure S5: The 10 % and 90 % percentiles of the cumulative size distribution based on the particle volume. Data are shown for dispersions stabilized with  $\beta$ -lg (*Ref*),  $\beta$ -lg + PC (*Chol*) and  $\beta$ -lg + DSPE (*Eta*) as a function of storage time: directly after preparation ( $t_0$ ), after four weeks ( $t_4$ ), after eight weeks ( $t_8$ ) and after eleven weeks ( $t_{11}$ ) of storage. PLs were used in concentrations of 0.05 wt% (*Chol* 0.05 and *Eta* 0.05 (a)) and 0.1 wt% (*Chol* 0.1 and *Eta* 0.1 (b)). Data of the samples cooled at a slow cooling rate are shown.

Table S1: The 90% percentile of the cumulative normalized undersize distribution of the *Ref* samples. Values are given as mean  $\pm$  SEM, and values marked with matching letters are significantly different according to one-way ANOVA with  $p = 0.05$  ( $N = 2$ ,  $n = 3$ ).

| <i>Ref</i> |                       |                      |
|------------|-----------------------|----------------------|
|            | slow (0.01–0.1 K/min) | fast (10 K/min)      |
| $t_0$      | $13 \pm 0.03^{abc}$   | $8.0 \pm 0.18^e$     |
| $t_4$      | $8.1 \pm 0.25^a$      | $8.5 \pm 0.02^f$     |
| $t_8$      | $8.4 \pm 0.85^b$      | $11 \pm 1.7^{ef}$    |
| $t_{11}$   | $8.2 \pm 0.89^c$      | $11.4 \pm 1.47^{ef}$ |

Table S2: The 90% percentile of the cumulative normalized undersize distribution of the *Chol 0.05* and *Chol 0.1* samples. Values are given as mean  $\pm$  SEM, and values marked with matching letters are significantly different according to one-way ANOVA with  $p = 0.05$  ( $N = 2$ ,  $n = 3$ ).

|          | <i>Chol 0.05</i>      |                 | <i>Chol 0.1</i>       |                      |
|----------|-----------------------|-----------------|-----------------------|----------------------|
|          | slow (0.01–0.1 K/min) | fast (10 K/min) | slow (0.01–0.1 K/min) | fast (10 K/min)      |
| $t_0$    | $6.1 \pm 0.16$        | $5.9 \pm 0.12$  | $5.8 \pm 0.30$        | $8.0 \pm 0.39^{cd}$  |
| $t_4$    | $5.9 \pm 0.028^a$     | $6.0 \pm 0.21$  | $5.9 \pm 0.12$        | $6.6 \pm 0.028^c$    |
| $t_8$    | $6.1 \pm 0.18^b$      | $6.1 \pm 0.23$  | $6.3 \pm 0.24$        | $7.6 \pm 1.10^e$     |
| $t_{11}$ | $7.6 \pm 1.7^{ab}$    | $6.4 \pm 0.31$  | $5.5 \pm 2.10$        | $3.3 \pm 0.01^{cde}$ |

Table S3: The 90% percentile of the cumulative normalized undersize distribution of the *Eta 0.05* and *Eta 0.1* samples. Values are given as mean  $\pm$  SEM, and values marked with matching letters are significantly different according to one-way ANOVA with  $p = 0.05$  ( $N = 2$ ,  $n = 3$ ).

|          | <i>Eta 0.05</i>       |                     | <i>Eta 0.1</i>        |                     |
|----------|-----------------------|---------------------|-----------------------|---------------------|
|          | slow (0.01–0.1 K/min) | fast (10 K/min)     | slow (0.01–0.1 K/min) | fast (10 K/min)     |
| $t_0$    | $6.2 \pm 0.86$        | $5.8 \pm 0.16^{ab}$ | $8.5 \pm 2.0^{efg}$   | $7.5 \pm 1.8^{hi}$  |
| $t_4$    | $5.5 \pm 0.51$        | $5.6 \pm 0.17^{cd}$ | $5.7 \pm 0.63^e$      | $5.0 \pm 0.58^{hj}$ |
| $t_8$    | $5.0 \pm 0.74$        | $4.8 \pm 0.30^{ac}$ | $4.7 \pm 0.24^f$      | $3.8 \pm 0.52^{ik}$ |
| $t_{11}$ | $4.8 \pm 0.48$        | $4.9 \pm 0.14^{bd}$ | $6.1 \pm 0.02^g$      | $7.7 \pm 1.2^{jk}$  |

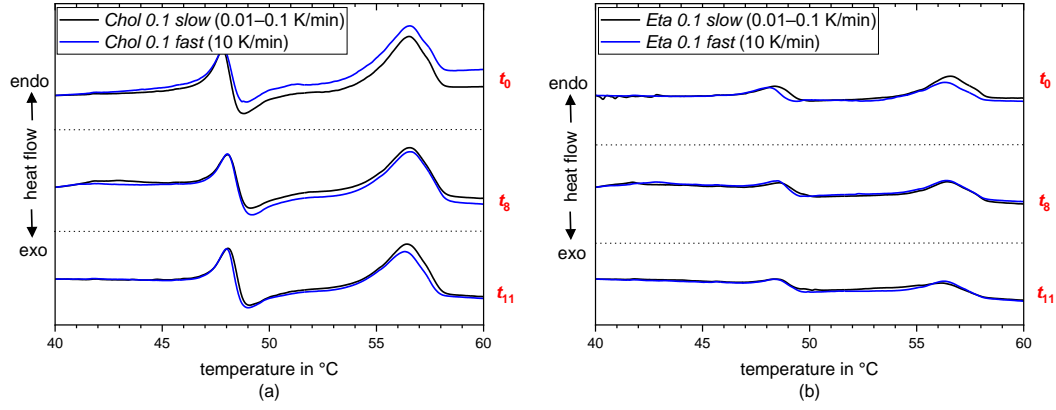

Figure S6: DSC melting thermograms of dispersions stabilized with  $\beta$ -lg + PC (*Chol 0.1* (a)) and  $\beta$ -lg + PE (*Eta 0.1* (b)) after slow (black lines) and fast (blue lines) crystallization directly after preparation ( $t_0$ ), after eight weeks ( $t_8$ ) and after eleven weeks ( $t_{11}$ ) of storage. PLs were used in a concentration of 0.1 wt%.

Table S4: Peak melting and crystallization temperature of the endo- and exothermic peaks in the DSC curves of the *Ref* samples. Values are given as mean  $\pm$  SEM ( $N = 2$ ,  $n = 1$ ).  $T_m$  = melting temperature,  $T_c$  = crystallization temperature, and  $T_m$  add. = melting temperature of the additional endotherm. \* No endotherm in the second sample replicate.

| <i>Ref</i>                  |          |                          |                                                  |                                                          |                                                             |                                         |
|-----------------------------|----------|--------------------------|--------------------------------------------------|----------------------------------------------------------|-------------------------------------------------------------|-----------------------------------------|
|                             |          | no. of<br>endothe<br>rms | $T_m$ add.<br>endotherm<br>in $^{\circ}\text{C}$ | $T_m$ 1 <sup>st</sup> endotherm<br>in $^{\circ}\text{C}$ | $T_m$ 2 <sup>nd</sup><br>endotherm<br>in $^{\circ}\text{C}$ | $T_c$ exotherm<br>in $^{\circ}\text{C}$ |
| slow<br>(0.01–0.1<br>K/min) | $t_0$    | 2                        |                                                  | $47.6 \pm 0.150$                                         | $56.2 \pm 0.255$                                            | $48.7 \pm 0.065$                        |
| slow<br>(0.01–0.1<br>K/min) | $t_8$    | 3                        | $41.5 \pm 0.380$                                 | $48.0 \pm 0.050$                                         | $56.5 \pm 0.600$                                            | $49.0 \pm 0.070$                        |
| slow<br>(0.01–0.1<br>K/min) | $t_{11}$ | 2                        |                                                  | $48.0 \pm 0.010$                                         | $56.5 \pm 0.110$                                            | $48.7 \pm 0.075$                        |
| fast<br>(10 K/min)          | $t_0$    | 2                        |                                                  | $47.7 \pm 0.065$                                         | $56.4 \pm 0.210$                                            | $48.6 \pm 0.020$                        |
| fast<br>(10 K/min)          | $t_8$    | 3                        | 43.2*                                            | $48.0 \pm 0.015$                                         | $56.5 \pm 0.000$                                            | $49.0 \pm 0.030$                        |
| fast<br>(10 K/min)          | $t_{11}$ | 2                        |                                                  | $47.9 \pm 0.020$                                         | $56.3 \pm 0.010$                                            | $48.6 \pm 0.020$                        |

Table S5: Peak melting and crystallization temperature of the endo- and exothermic peaks in the DSC curves of the *Chol 0.05* samples. Values are given as mean  $\pm$  SEM ( $N = 2$ ,  $n = 1$ ).  $T_m$  = melting temperature,  $T_c$  = crystallization temperature, and  $T_m$  add. = melting temperature of the additional endotherm. \* No endotherm in the second sample replicate.

| <i>Chol 0.05</i>            |          |                          |                                               |                                              |                                              |                                            |
|-----------------------------|----------|--------------------------|-----------------------------------------------|----------------------------------------------|----------------------------------------------|--------------------------------------------|
|                             |          | no. of<br>endotherm<br>s | $T_m$ add. endotherm<br>in $^{\circ}\text{C}$ | $T_m$ 1st endotherm<br>in $^{\circ}\text{C}$ | $T_m$ 2nd endotherm<br>in $^{\circ}\text{C}$ | $T_c$<br>exotherm<br>in $^{\circ}\text{C}$ |
| slow<br>(0.01–0.1<br>K/min) | $t_0$    | 2                        |                                               | $47.7 \pm 0.005$                             | $56.4 \pm 0.050$                             | $48.7 \pm 0.065$                           |
| slow<br>(0.01–0.1<br>K/min) | $t_8$    | 3                        | 44.9*                                         | $48.1 \pm 0.055$                             | $56.6 \pm 0.005$                             | $49.1 \pm 0.040$                           |
| slow<br>(0.01–0.1<br>K/min) | $t_{11}$ | 2                        |                                               | $48.9 \pm 0.060$                             | $56.3 \pm 0.010$                             | $48.7 \pm 0.070$                           |
| fast<br>(10 K/min)          | $t_0$    | 2                        |                                               | $47.6 \pm 0.160$                             | $56.3 \pm 0.175$                             | $48.6 \pm 0.020$                           |
| fast<br>(10 K/min)          | $t_8$    | 3                        | $43.8 \pm 1.180$                              | $48.0 \pm 0.010$                             | $56.5 \pm 0.015$                             | $49.0 \pm 0.045$                           |
| fast<br>(10 K/min)          | $t_{11}$ | 2                        |                                               | $47.9 \pm 0.040$                             | $56.2 \pm 0.065$                             | $48.7 \pm 0.180$                           |

Table S6: Peak melting and crystallization temperature of the endo- and exothermic peaks in the DSC curves of the *Chol 0.1* samples. Values are given as mean  $\pm$  SEM ( $N = 2$ ,  $n = 1$ ).  $T_m$  = melting temperature,  $T_c$  = crystallization temperature, and  $T_m$  add. = melting temperature of the additional endotherm. \* No endotherm in the second sample replicate.

| <i>Chol 0.1</i>          |          |                          |                                               |                                              |                                                 |                                            |
|--------------------------|----------|--------------------------|-----------------------------------------------|----------------------------------------------|-------------------------------------------------|--------------------------------------------|
|                          |          | no. of<br>endothe<br>rms | $T_m$ add. endotherm<br>in $^{\circ}\text{C}$ | $T_m$ 1st endotherm<br>in $^{\circ}\text{C}$ | $T_m$ 2nd<br>endotherm<br>in $^{\circ}\text{C}$ | $T_c$<br>exotherm<br>in $^{\circ}\text{C}$ |
| slow<br>(0.01–0.1 K/min) | $t_0$    | 2                        |                                               | $47.6 \pm 0.000$                             | $56.3 \pm 0.030$                                | $48.6 \pm 0.020$                           |
| slow<br>(0.01–0.1 K/min) | $t_8$    | 3                        | 41.7*                                         | $48.1 \pm 0.110$                             | $56.5 \pm 0.150$                                | $49.0 \pm 0.110$                           |
| slow<br>(0.01–0.1 K/min) | $t_{11}$ | 2                        |                                               | $48.0 \pm 0.030$                             | $56.4 \pm 0.085$                                | $48.6 \pm 0.020$                           |
| fast<br>(10 K/min)       | $t_0$    | 2                        |                                               | $47.6 \pm 0.080$                             | $56.3 \pm 0.080$                                | $48.6 \pm 0.020$                           |
| fast<br>(10 K/min)       | $t_8$    | 3                        | $41.4 \pm 0.375$                              | $48.0 \pm 0.115$                             | $56.5 \pm 0.155$                                | $49.1 \pm 0.195$                           |
| fast<br>(10 K/min)       | $t_{11}$ | 2                        |                                               | $47.9 \pm 0.025$                             | $56.2 \pm 0.010$                                | $48.6 \pm 0.020$                           |

Table S7: Peak melting and crystallization temperature of the endo- and exothermic peaks in the DSC curves of the *Eta 0.05* samples. Values are given as mean  $\pm$  SEM ( $N = 2$ ,  $n = 1$ ).  $T_m$  = melting temperature,  $T_c$  = crystallization temperature, and  $T_m$  add. = melting temperature of the additional endotherm. \* No endotherm in the second sample replicate.

| <i>Eta 0.05</i>          |          |                          |                                               |                                                 |                                              |                                            |
|--------------------------|----------|--------------------------|-----------------------------------------------|-------------------------------------------------|----------------------------------------------|--------------------------------------------|
|                          |          | no. of<br>endotherm<br>s | $T_m$ add.<br>endotherm in $^{\circ}\text{C}$ | $T_m$ 1st<br>endotherm<br>in $^{\circ}\text{C}$ | $T_m$ 2nd endotherm<br>in $^{\circ}\text{C}$ | $T_c$<br>exotherm<br>in $^{\circ}\text{C}$ |
| slow<br>(0.01–0.1 K/min) | $t_0$    | 2                        |                                               | $48.2 \pm 0.165$                                | $56.4 \pm 0.155$                             | $49.5 \pm 0.135$                           |
| slow<br>(0.01–0.1 K/min) | $t_8$    | 3                        | $43.5 \pm 0.240$                              | $48.6 \pm 0.030$                                | $56.6 \pm 0.030$                             | $50.0 \pm 0.090$                           |
| slow<br>(0.01–0.1 K/min) | $t_{11}$ | 2                        |                                               | $48.3 \pm 0.005$                                | $56.3 \pm 0.010$                             | $49.5 \pm 0.135$                           |
| fast<br>(10 K/min)       | $t_0$    | 2                        |                                               | $48.2 \pm 0.145$                                | $56.4 \pm 0.025$                             | $49.3 \pm 0.170$                           |
| fast<br>(10 K/min)       | $t_8$    | 3                        | $43.8 \pm 1.020$                              | $48.5 \pm 0.120$                                | $56.5 \pm 0.015$                             | $49.7 \pm 0.170$                           |
| fast<br>(10 K/min)       | $t_{11}$ | 2                        |                                               | $48.3 \pm 0.135$                                | $56.4 \pm 0.010$                             | $49.3 \pm 0.170$                           |

Table S8: Peak melting and crystallization temperature of the endo- and exothermic peaks in the DSC curves of the *Eta 0.1* samples. Values are given as mean  $\pm$  SEM ( $N = 2$ ,  $n = 1$ ).  $T_m$  = melting temperature,  $T_c$  = crystallization temperature, and  $T_m$  add. = melting temperature of the additional endotherm. \* No endotherm in the second sample replicate.

| <i>Eta 0.1</i>           |          |                          |                                                  |                                              |                                                 |                                         |
|--------------------------|----------|--------------------------|--------------------------------------------------|----------------------------------------------|-------------------------------------------------|-----------------------------------------|
|                          |          | no. of<br>endother<br>ms | $T_m$ add.<br>endotherm<br>in $^{\circ}\text{C}$ | $T_m$ 1st endotherm<br>in $^{\circ}\text{C}$ | $T_m$ 2nd<br>endotherm<br>in $^{\circ}\text{C}$ | $T_c$ exotherm<br>in $^{\circ}\text{C}$ |
| slow<br>(0.01–0.1 K/min) | $t_0$    | 2                        |                                                  | $48.3 \pm 0.025$                             | $56.5 \pm 0.075$                                | $49.7 \pm 0.265$                        |
| slow<br>(0.01–0.1 K/min) | $t_8$    | 3                        | 41.7*                                            | $48.6 \pm 0.080$                             | $56.4 \pm 0.080$                                | $50.3 \pm 0.255$                        |
| slow<br>(0.01–0.1 K/min) | $t_{11}$ | 2                        |                                                  | $48.4 \pm 0.165$                             | $56.0 \pm 0.285$                                | $49.8 \pm 0.265$                        |
| fast<br>(10 K/min)       | $t_0$    | 2                        |                                                  | $48.1 \pm 0.115$                             | $56.2 \pm 0.110$                                | $49.2 \pm 0.170$                        |
| fast<br>(10 K/min)       | $t_8$    | 3                        | $41.7 \pm 1.085$                                 | $48.5 \pm 0.030$                             | $56.4 \pm 0.085$                                | $49.7 \pm 0.215$                        |
| fast<br>(10 K/min)       | $t_{11}$ | 2                        |                                                  | $48.4 \pm 0.150$                             | $56.3 \pm 0.105$                                | $49.2 \pm 0.170$                        |
